# Supplementary material for: Impaired parkin-mediated mitochondrial targeting to autophagosomes differentially contributes to tissue pathology in lysosomal storage diseases
Source: PubMed Central journal article supplement — Hum Mol Genet. 2012 Jan 3;21(8):1770–81. doi: 10.1093/hmg/ddr610 (PMC3313794; doi:10.1093/hmg/ddr610), 2012-01-03
Supplement: supp_ddr610_ddr610supp.pdf [file supp_ddr610_ddr610supp.pdf]

**Figure S1**

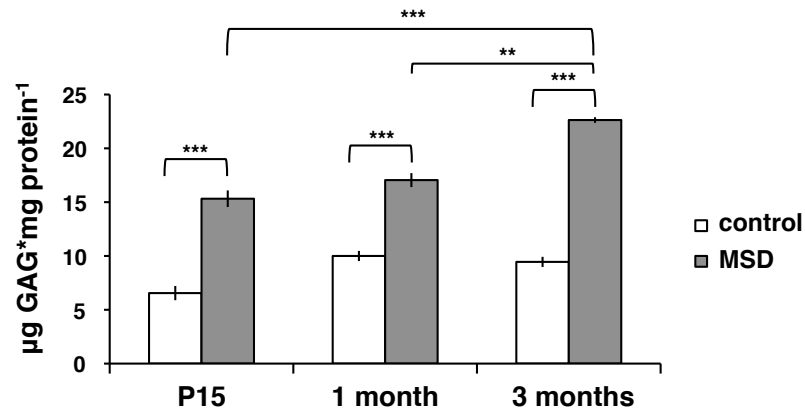

**Figure S1. Progressive GAG accumulation in MSD liver.** Quantification of glycosaminoglycans (GAGs) was performed using the DMB-Tris/Formate assay in liver samples from MSD (n=4) and control mice (n=4) at P15, 1 month and 3 months of age. Results are represented as the amount ( $\mu\text{g}$ ) of GAG per mg of total protein. ANOVA p-value= 5.5E-09; \*\* p-value< 0.01; \*\*\* p-value< 0.005.

## Figure S2

### Liver

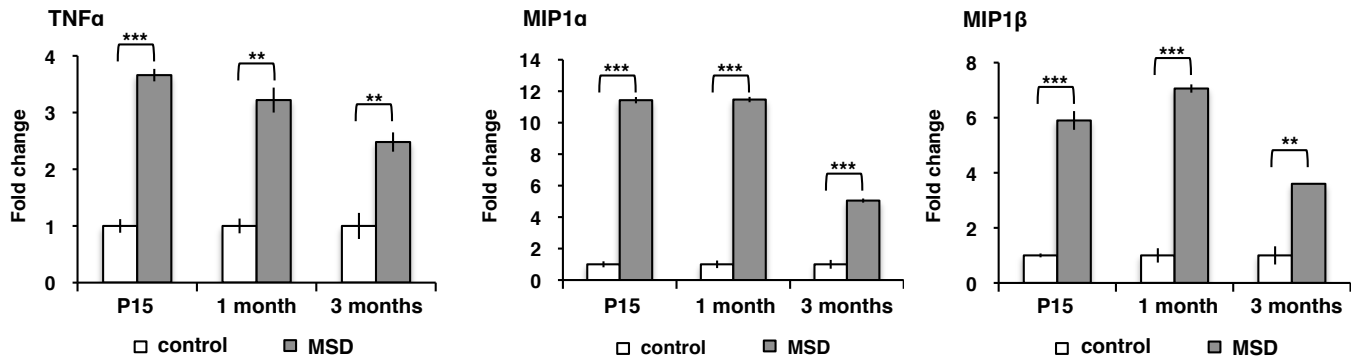

### Brain

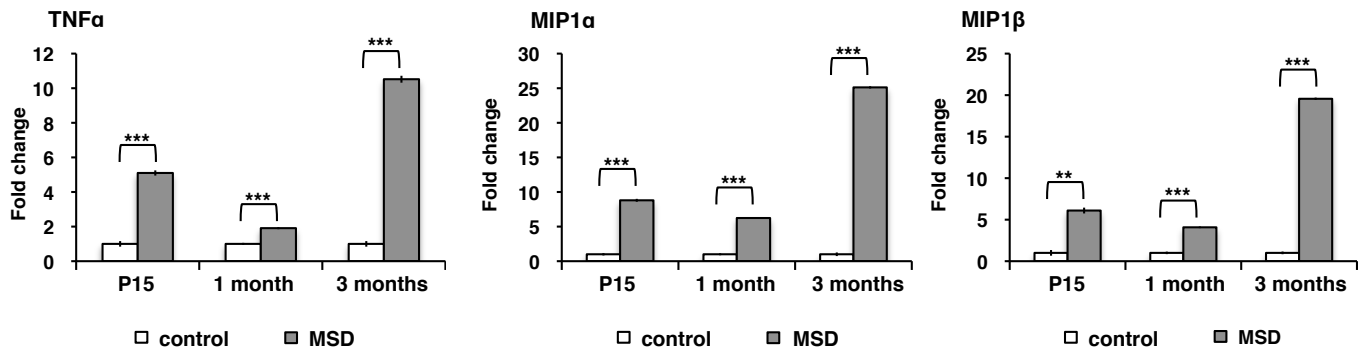

**Figure S2. Expression of pro-inflammatory cytokines in MSD.** Real-time PCR of pro-inflammatory cytokines (TNF $\alpha$ , MIP1 $\alpha$  and MIP1 $\beta$ ) in liver (top) and brain (bottom) of MSD (n=4) and control (n=4) mice at P15, 1 month and 3 months of age. Results are expressed as fold-change compared to control. ANOVA Liver TNF $\alpha$  p-value=3.09E-04, MIP1 $\alpha$  p-value=1.85E-04, MIP1 $\beta$  p-value=2.36E-03; ANOVA Brain TNF $\alpha$  p-value=2.03E-03, MIP1 $\alpha$  p-value=1.37E-05, MIP1 $\beta$  p-value=5.35E-05. \*\* p-value < 0.05; \*\*\* p-value < 0.001.
